# Supplementary material for: Determination of Polyphenolic Profile of Apple Pomace (Malus domestica Golden Delicious Variety) by HPLC–MS
Source: PubMed Central journal article supplement — ACS Omega. 2023 Dec 15;9(1):196–203. doi: 10.1021/acsomega.3c03218 (PMC10785061; doi:10.1021/acsomega.3c03218), 2023-12-15
Supplement: ao3c03218_si_001.pdf [file ao3c03218_si_001.pdf]

*Supplementary Material*

## **Determination of polyphenolic profile of Apple pomace (*Malus domestica* Golden Delicious variety) by HPLC-MS**

**Laura A. Orozco-Flores<sup>1</sup>, Erika Salas<sup>1,\*</sup>, Beatriz Rocha-Gutiérrez<sup>1</sup>, María Del R. Peralta-Pérez<sup>1</sup>, Guillermo González-Sánchez<sup>2</sup> and Lourdes Ballinas-Casarrubias<sup>1,\*</sup>**

<sup>1</sup> Facultad de Ciencias Químicas. Universidad Autónoma de Chihuahua (UACH), Circuito Universitario Campus II, Chihuahua, 31125, Chihuahua, Mexico.

<sup>2</sup> Departamento de Medio Ambiente y Energía, Centro de Investigación en Materiales Avanzados (CIMAV), Miguel de Cervantes 120 Complejo Industrial Chihuahua, Chihuahua, 31136, Chihuahua, Mexico.

\* Correspondence: mballinas@uach.mx; [esalas@uach.mx](mailto:esalas@uach.mx) +52 (614) 2366000 Ext. 4288

Received: date; Accepted: date; Published: date

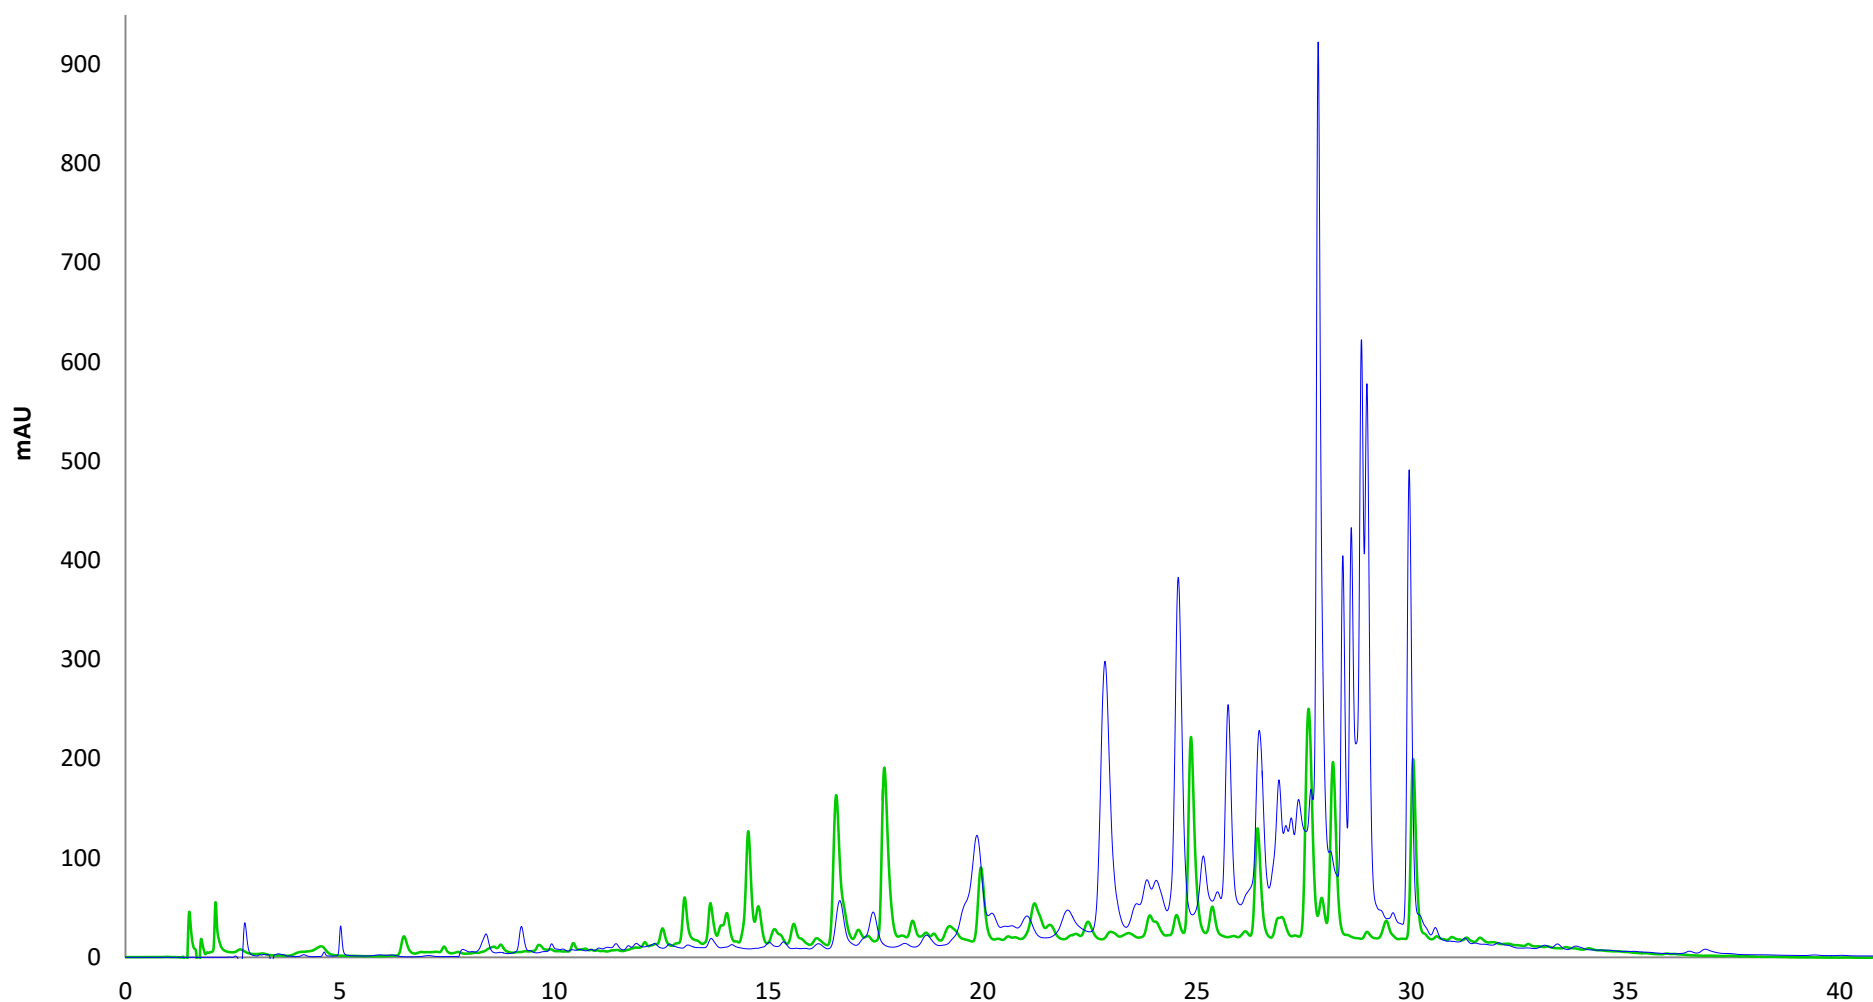

**Figure S1.** Chromatogram (at 280 nm) of samples from apple skin. Blue signal represents the ripe apple skin extracted with 80-20% ethanol-water/acetic acid 5% (v/v) (S1); green signal represents ripe apple skin extracted with 20-80% ethanol-water/acetic acid 5% (v/v) (S2).

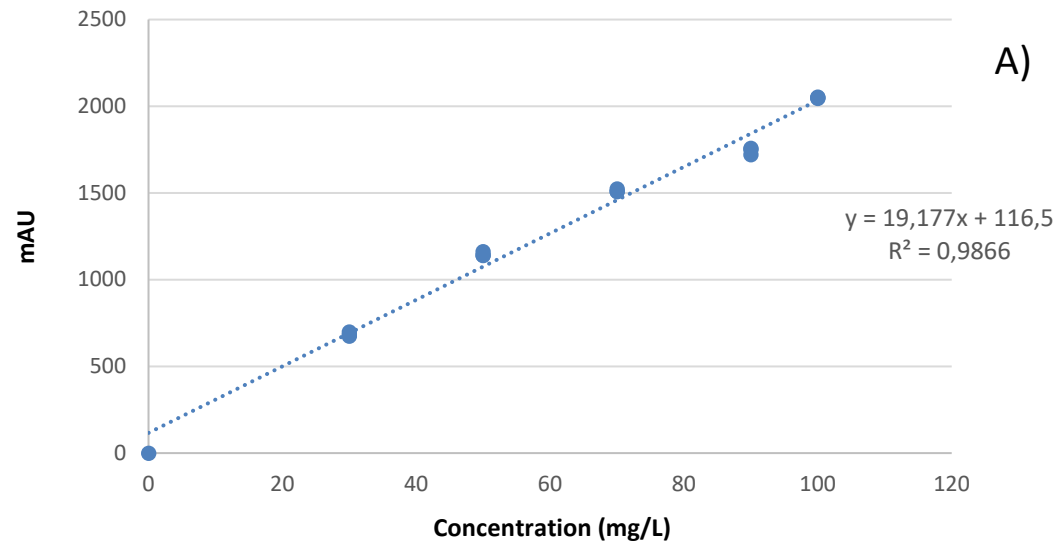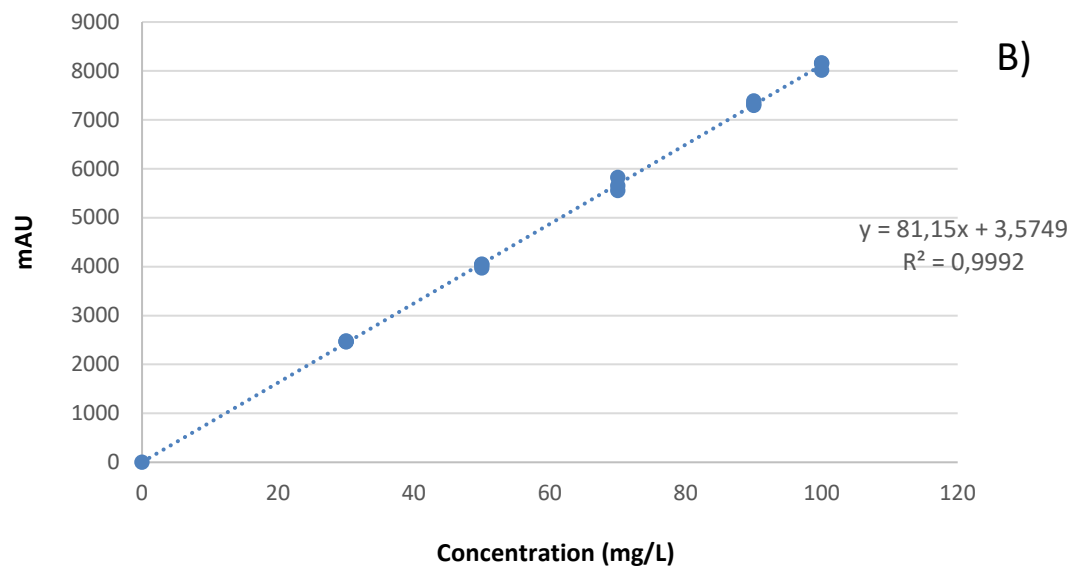

**Figure S2.** Calibration curves for the three different quantifications. A) epicatechin; B) gallic acid.

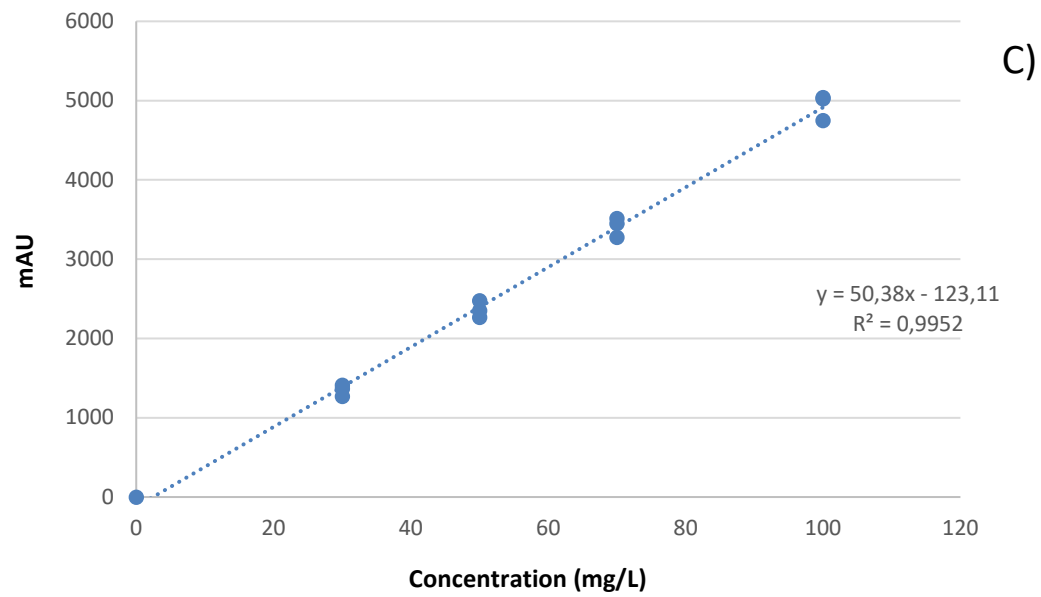

**Figure S2. CONT.-** Calibration curves for the three different quantifications. C) rutin.

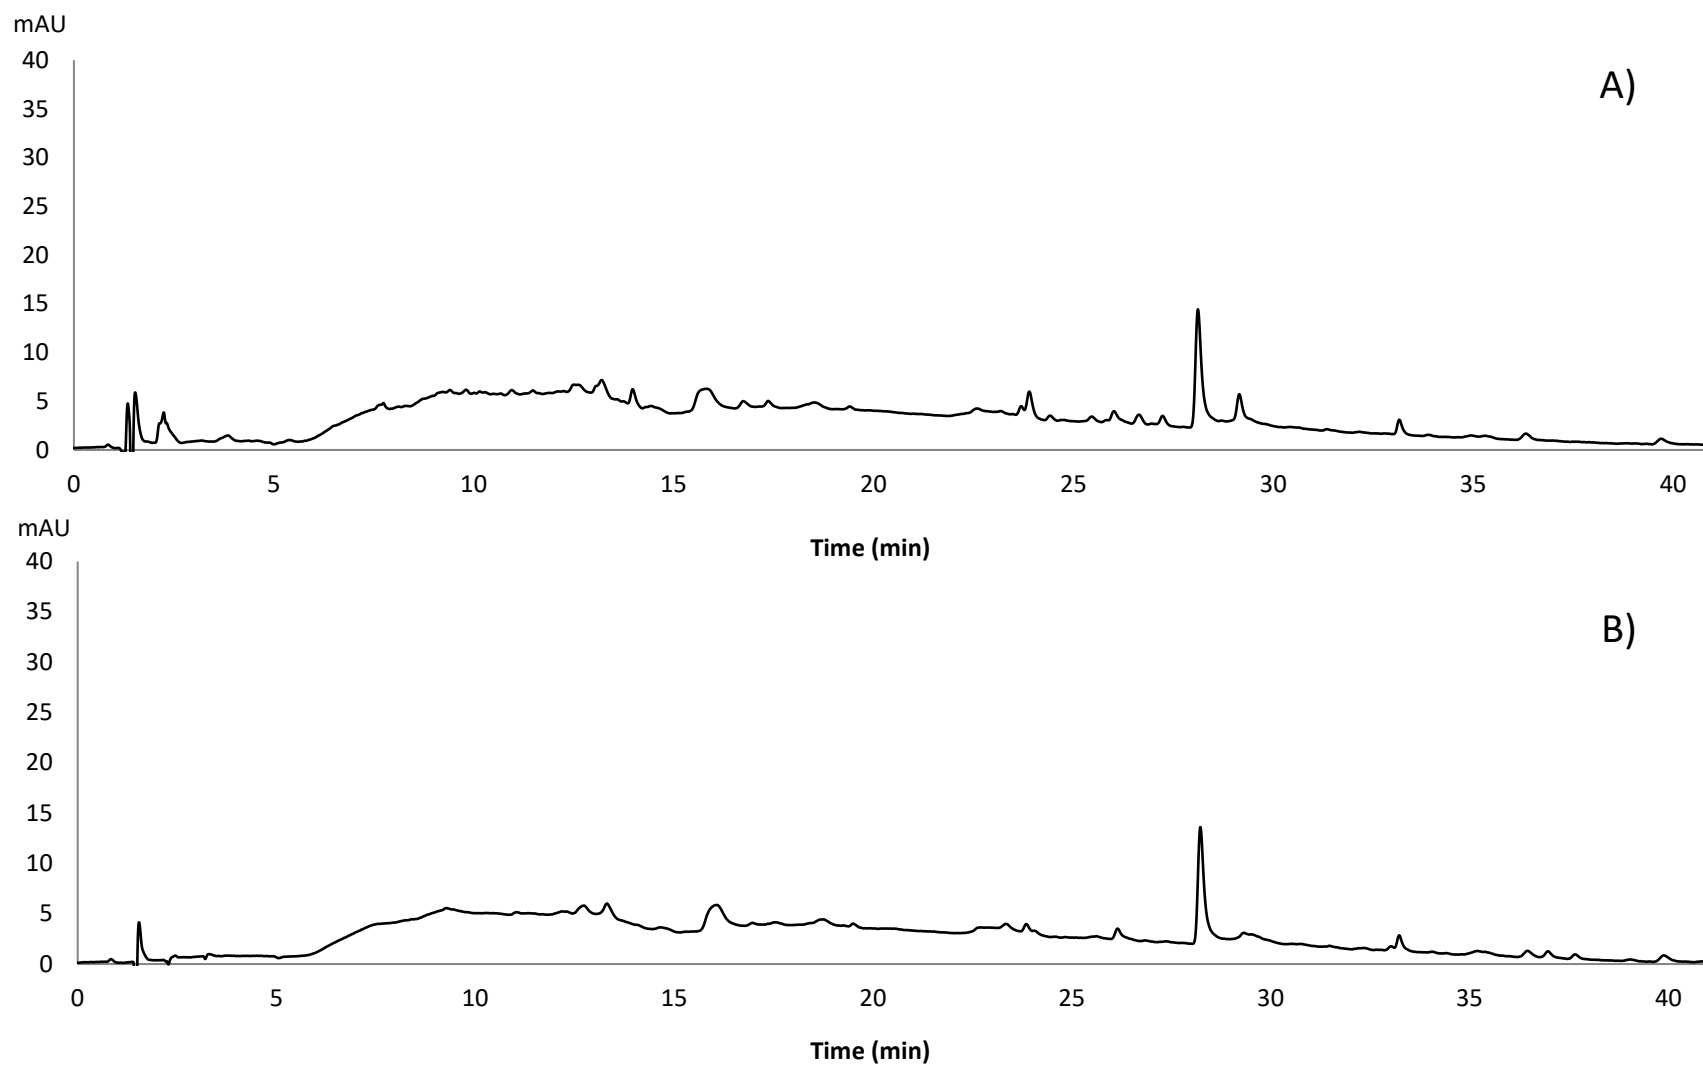

**Figure S3.** Chromatograms of TPC (at 280 nm) of: A) the precipitate obtained from the cold ethanol precipitation re-dissolved in acidified water (1% acetic acid); B) subsequent liquid-liquid extraction with 1:1 hexane/water.

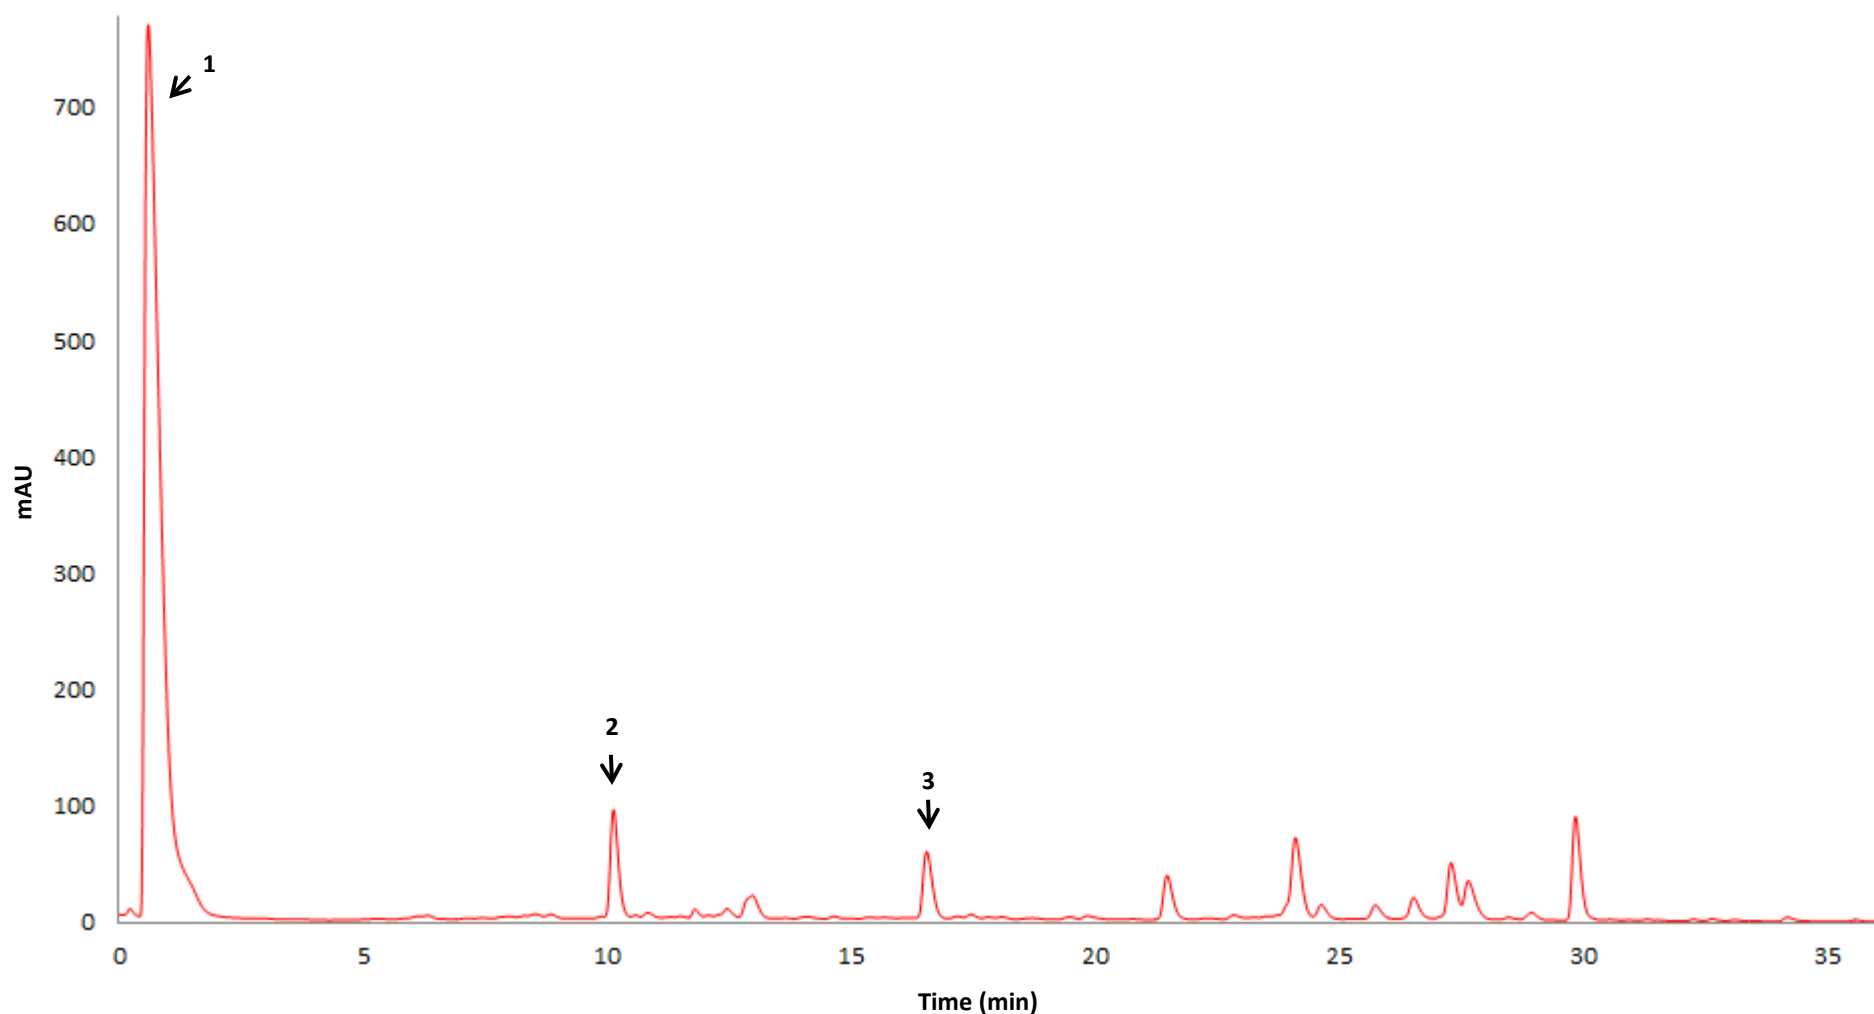

**Figure S4.** Chromatogram (at 280 nm) of sample from commercial apple pomace extracted with 80-20% ethanol-water/acetic acid 5% (v/v) (S1). The signal represents the extract after phloroglucinolysis was performed. Peaks are as follow: 1 – excess phloroglucinol; 2 – epicatechin-phloroglucinol adduct; 3 – epicatechin.
